# Supplementary material for: Application Route and Immune Status of the Host Determine Safety and Oncolytic Activity of Oncolytic Coxsackievirus B3 Variant PD-H
Source: Viruses. 2021 Sep 24;13(10):1918. doi: 10.3390/v13101918 (PMC8539752; doi:10.3390/v13101918)
Supplement: Supplementary file 1 [file viruses-13-01918-s001.zip › viruses-1363453-supplementary.pdf]

## Supplementary Data

| Gene          | Position       | Mutations compare to PD (Genbank accession no: AF231765)                                                                           |
|---------------|----------------|------------------------------------------------------------------------------------------------------------------------------------|
| <b>5' UTR</b> | 1 - 742 nt     | 610. nt C → T                                                                                                                      |
| <b>VP4</b>    | 743 - 949 nt   | 881. nt C → T (VP4 47. aa T→A)                                                                                                     |
| <b>VP2</b>    | 950 - 1738 nt  | No differences                                                                                                                     |
| <b>VP3</b>    | 1739 - 2452 nt | 1801. nt A→G (VP3 34. aa T→M)<br>1839. nt C→T (silent mutation)<br>2448. nt C→A (VP3 237. aa F→Y)                                  |
| <b>VP1</b>    | 2453 - 3295 nt | 2965. nt A→G (silent mutation)                                                                                                     |
| <b>2A</b>     | 3296 - 3745 nt | No differences                                                                                                                     |
| <b>2B</b>     | 3746 – 4042 nt | No differences                                                                                                                     |
| <b>2C</b>     | 4043 – 5029 nt | 4078. nt A→G (silent mutation)<br>4165. nt A→G (silent mutation)<br>4167. nt G→A (2C 42. aa G→E)<br>4878. nt A→G (silent mutation) |
| <b>3A</b>     | 5030 – 5296 nt | No differences                                                                                                                     |
| <b>3B</b>     | 5297 – 5362 nt | No differences                                                                                                                     |
| <b>3C</b>     | 5363 – 5911 nt | No differences                                                                                                                     |
| <b>3D</b>     | 5912 – 7300 nt | 7169. nt C→T (silent mutation)<br>7174. nt A→G (silent mutation)                                                                   |
| <b>3' UTR</b> | 7301 – 7400 nt | No differences                                                                                                                     |

**Table S1. Nucleotide and amino acid differences between CVB3 variant PD (Gene bank accession number: AF231765) and the cDNA clone of PD-0 (PD-H).** PD-H contains following nucleotide differences relative to PD: C610T, C881T, A1801G, C1839T, C2448A, A2965G, A4078G, A4165G, G4167A, A4878G, C7169T and A7174G. (First letter indicates the nucleotide according to GenBank sequence, last letter indicates the nucleotide according to our sequence, number indicates the position of nucleotide). nt: nucleotide. aa: amino acid. UTR: untranslated region. Note: One nucleotide difference (C881T) was identified between PD-H and PD-0.

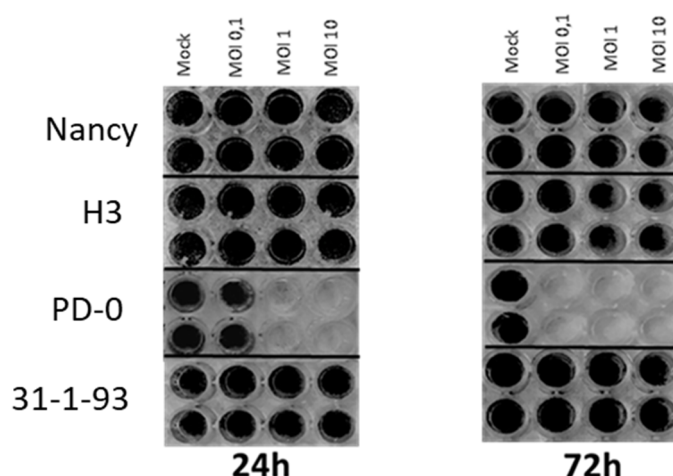

### Supplementary Figure S1

**Cytotoxicity of CVB3 strains Nancy, H3, PD-0 and 31-1-93 in the colorectal carcinoma cell line Colon-26.** Colon-26 cells grown in 96-well plates were infected with indicated virus strains and MOIs and analyzed for inducing of cytotoxicity 24 h and 72 h later by staining the cells with crystal violet.

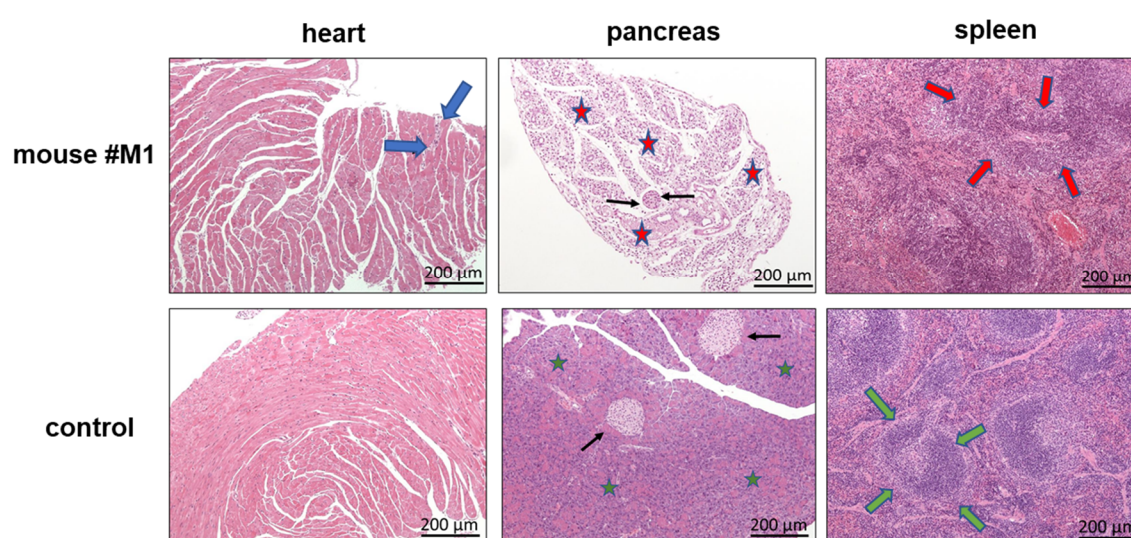

### Supplementary Figure S2

**Side effects induced by PD-H after intratumoral injection into DLD1 tumors of mouse #M1.** Balb/C mice were injected with  $5 \times 10^5$  DLD-1 cells into both flanks. When the tumor sizes reached  $\sim 0.5$  cm diameter, one of the tumors was injected with  $3 \times 10^6$  pfu PD-H. Mouse #1 was sacrificed 13 days after tumor cell administration because of poor health. Tissue slides were stained with H&E. Blue arrows, reveal small, focal areas of inflammation and myocyte damage in the heart; black arrows, no damage of islets of Langerhans in the pancreas; red stars, damaged exocrine pancreas tissue; green stars, intact pancreas tissue; red arrows, rarefaction of spleen follicles; green arrows normal follicles of spleen.

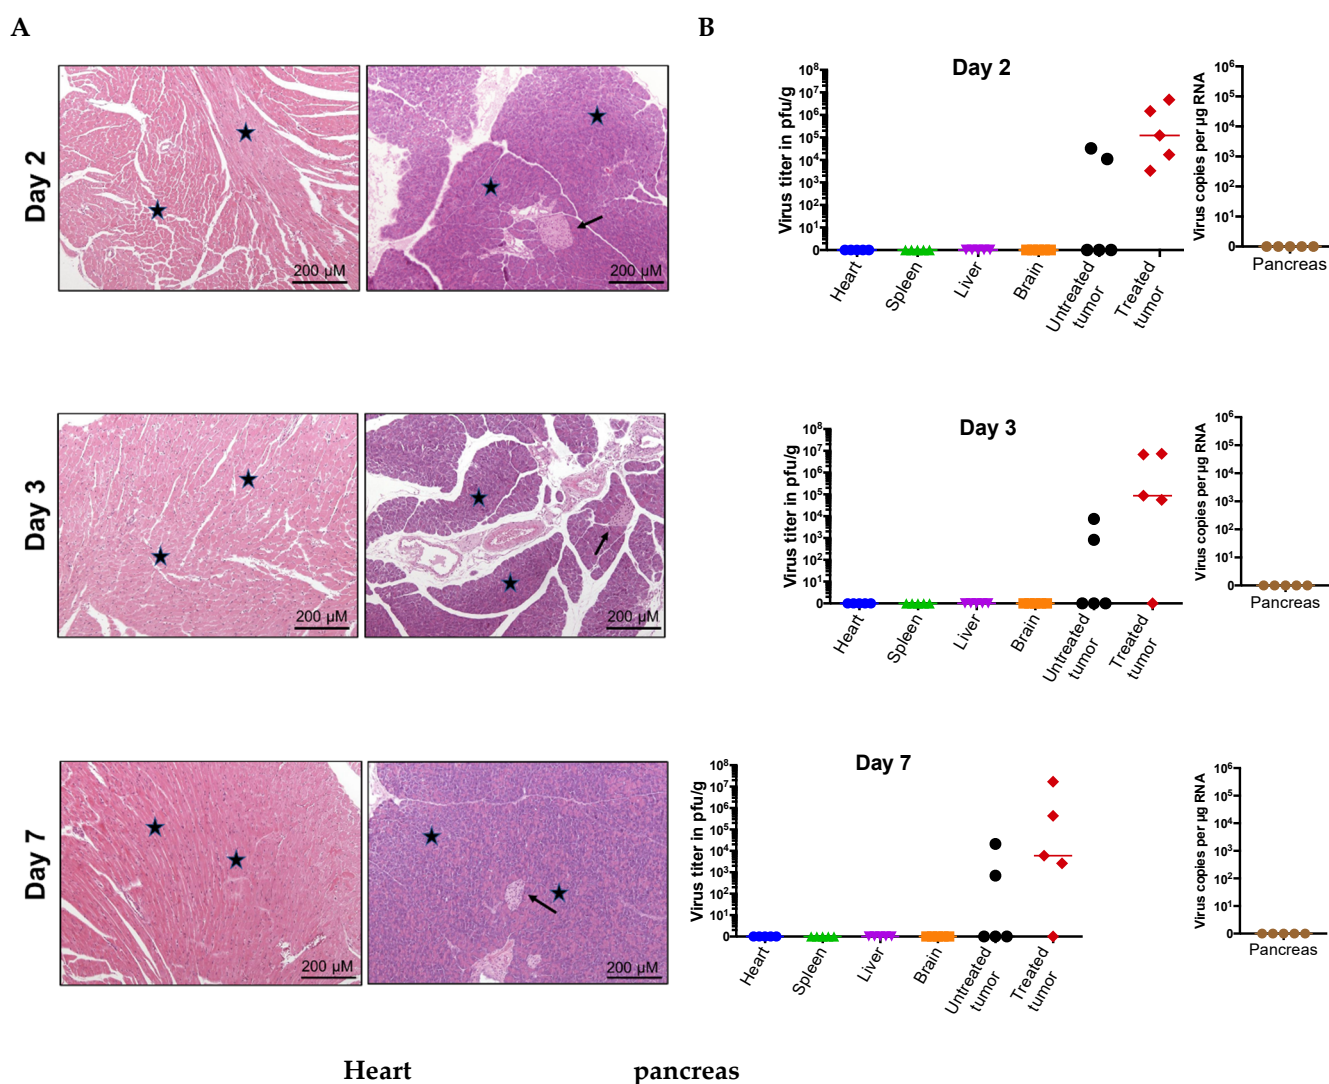

### Supplementary Figure S3

**Biodistribution of PD-H after intratumoral injection into subcutaneous Colon-26 tumors of Balb/C mice.** Balb/C mice were injected with  $2 \times 10^5$  Colon 26 cells into both flanks. When the tumor sizes reached  $\sim 0.5$  cm diameter, one of the tumors was injected with  $1 \times 10^6$  pfu PD-H ( $n=5$ ). Animals were sacrificed 2, 3 and 7 days after virus injection. (A) The pancreases and the hearts were histologically investigated after staining the tissue with H&E. Black stars, normal tissue; black arrow, islet of Langerhans. (B) Virus load was determined by plaque assay in the organs and in the injected and non-injected contralateral tumors (*left diagrams*). In the pancreas, the virus RNA copy number was determined by real time RT-PCR (*right diagrams*). The data are shown for each animal and as medians for each group.

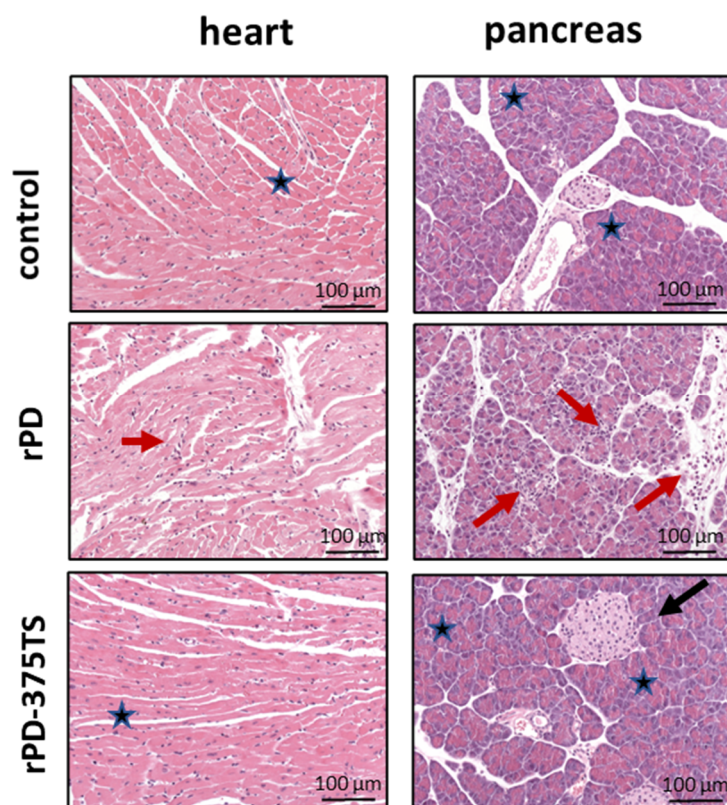

#### Supplementary Figure S4

**Balb/C mice infected intraperitoneally (i.p.) with PD-H-375TS do not develop pancreatitis and myocarditis.** Balb/C were i.p. infected with each  $5 \times 10^6$  pfu PD-H (n=4), PD-H-375TS (n=4) or injected with PBS (n=2) at three consecutive days. Animals were sacrificed 7 days after the first virus injection and organs were histologically examined after staining with H&E. black stars, normal tissue; black arrow, islet of Langerhans; red arrows, tissue areas with mononuclear cell infiltration.
